# Supplementary material
Source: PubMed Central journal article supplement (PMC3048902)

**Supplementary Figure S2:** Flow chart of the data analysis procedure used to identify each of the four types of peptides in Xlink-Identifier.

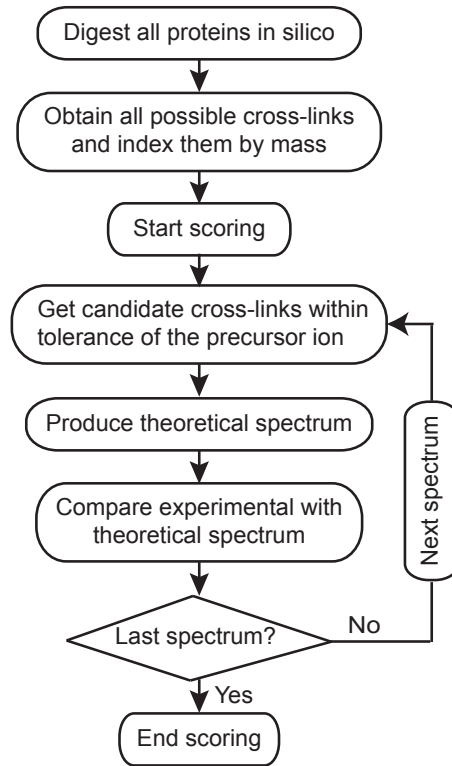

Supplement: NIHMS261257-supplement-2_si_002.pdf [file NIHMS261257-supplement-2_si_002.pdf]
